# Supplementary material for: A new statistical model for analyzing rating scale data pertaining to word meaning
Source: Springer Nature journal article supplement (doi:10.1007/s00426-017-0864-8), 2017-04-25
Supplement: MOESM3 [file 12245490]

### Additional Materials

#### 1.


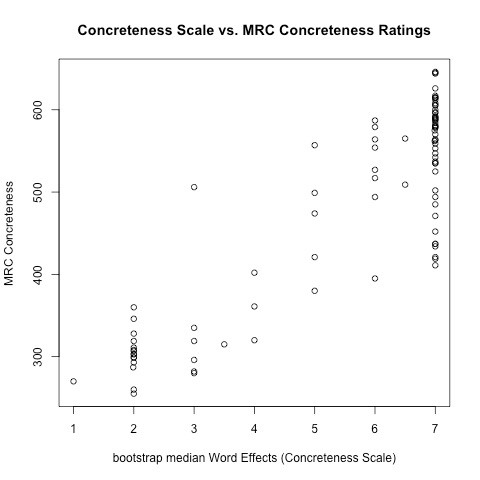


**Figure 1: Correlation between the MRC Concreteness ratings and the bootstrap median Word Effects (Pearson’s r = .871, Spearman's rho = .771).** To calculate the bootstrap median Word Effects (WEs), we implemented the following steps: a) we artificially simulated 1000 data sets; b) we fitted a 2-way MPA model to each of these data sets; c) we extracted the WEs and the overall values from each 2-way MPA model;

#### d) we resized the WEs to values between 1 and 7 by adding the corresponding overall value to them; e) we calculated the bootstrap median WEs from the population of simulated WEs.

2.


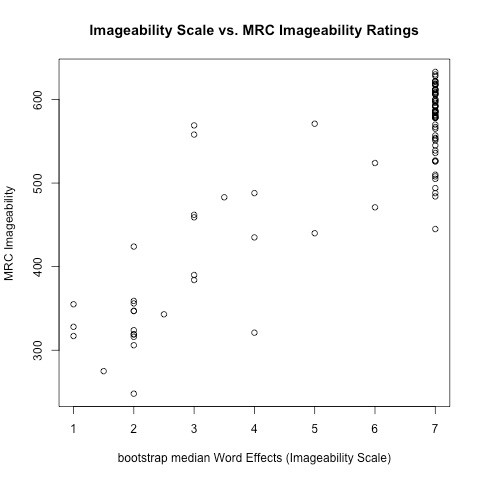


**Figure 2: Correlation between the MRC Imageability ratings and the bootstrap median Word Effects (Pearson’s r = .878, Spearman's rho = .774).** To calculate the bootstrap median Word Effects (WEs), we implemented the following steps: a) we artificially simulated 1000 data sets; b) we fitted a 2-way MPA model to each of these data sets; c) we extracted the WEs and the overall values from each 2-way MPA model;

#### d) we resized the WEs to values between 1 and 7 by adding the corresponding overall value to them; e) we calculated the bootstrap median WEs from the population of simulated WEs.

3.

| **Nouns** | **Categories** | **ACT_LB** | **ACT_M** | **ACT_UB** | **CON_LB** | **CON_M** | **CON_UB** | **IMA_LB** | **IMA_M** | **IMA_UB** | **SEN_LB** | **SEN_M** | **SEN_UB** |
| --- | --- | --- | --- | --- | --- | --- | --- | --- | --- | --- | --- | --- | --- |
| Accord | Abstract | 1.00 | 1.00 | 2.00 | 2.00 | 2.00 | 3.00 | 1.00 | 2.00 | 2.00 | 1.00 | 1.78 | 2.00 |
| Affair | Abstract | 1.00 | 1.00 | 1.00 | 2.00 | 2.00 | 3.00 | 2.00 | 2.00 | 3.00 | 1.04 | 2.00 | 2.00 |
| Belief | Abstract | 1.00 | 1.00 | 1.00 | 1.00 | 1.00 | 2.00 | 1.00 | 1.00 | 2.00 | 1.00 | 1.41 | 2.00 |
| Blame | Abstract | 1.00 | 1.00 | 1.00 | 2.00 | 2.00 | 2.00 | 1.00 | 2.00 | 2.00 | 1.00 | 1.06 | 2.00 |
| Debut | Abstract | 1.00 | 1.00 | 1.00 | 2.00 | 2.00 | 2.00 | 2.00 | 2.00 | 2.00 | 1.00 | 2.00 | 2.00 |
| Ethic | Abstract | 1.00 | 1.00 | 1.00 | 1.00 | 1.00 | 2.00 | 1.00 | 1.00 | 2.00 | 1.00 | 1.00 | 1.89 |
| Motive | Abstract | 1.00 | 1.00 | 1.00 | 1.97 | 2.00 | 2.00 | 1.00 | 1.50 | 2.00 | 1.00 | 1.06 | 2.00 |
| Origin | Abstract | 1.00 | 1.00 | 1.00 | 1.00 | 2.00 | 2.00 | 1.00 | 2.00 | 2.00 | 1.00 | 1.03 | 2.00 |
| Pardon | Abstract | 1.00 | 1.00 | 1.00 | 1.99 | 2.00 | 2.00 | 1.00 | 1.00 | 2.00 | 1.00 | 1.70 | 2.00 |
| Phase | Abstract | 1.00 | 1.00 | 1.00 | 1.98 | 2.00 | 2.00 | 1.00 | 2.00 | 2.00 | 1.02 | 2.00 | 2.00 |
| Plea | Abstract | 1.00 | 1.00 | 1.00 | 2.00 | 2.00 | 2.50 | 2.00 | 2.00 | 2.00 | 1.00 | 2.00 | 2.00 |
| Realm | Abstract | 1.00 | 1.00 | 1.00 | 1.00 | 2.00 | 2.00 | 1.50 | 2.00 | 2.00 | 1.00 | 2.00 | 2.00 |
| Regret | Abstract | 1.00 | 1.00 | 1.00 | 1.00 | 2.00 | 2.00 | 1.00 | 2.00 | 2.00 | 1.00 | 1.73 | 2.00 |
| Scheme | Abstract | 1.00 | 1.00 | 1.00 | 1.97 | 2.00 | 2.00 | 1.00 | 2.00 | 2.00 | 1.00 | 1.69 | 2.00 |
| Theory | Abstract | 1.00 | 1.00 | 1.00 | 1.00 | 1.99 | 2.00 | 1.00 | 1.00 | 2.00 | 1.00 | 1.16 | 2.00 |
| Treaty | Abstract | 2.50 | 3.00 | 4.00 | 3.00 | 4.00 | 5.00 | 3.00 | 4.00 | 5.00 | 2.00 | 2.27 | 3.00 |
| Upkeep | Abstract | 1.00 | 1.00 | 2.00 | 1.98 | 2.00 | 2.00 | 2.00 | 2.00 | 2.00 | 1.00 | 2.00 | 2.00 |
| Ball | Manipulable | 7.00 | 7.00 | 7.00 | 6.98 | 7.00 | 7.00 | 7.00 | 7.00 | 7.00 | 7.00 | 7.00 | 7.00 |
| Bat | Manipulable | 7.00 | 7.00 | 7.00 | 6.98 | 7.00 | 7.00 | 7.00 | 7.00 | 7.00 | 6.00 | 7.00 | 7.00 |
| Bottle | Manipulable | 7.00 | 7.00 | 7.00 | 6.98 | 7.00 | 7.00 | 7.00 | 7.00 | 7.00 | 7.00 | 7.00 | 7.00 |
| Brush | Manipulable | 7.00 | 7.00 | 7.00 | 6.98 | 7.00 | 7.00 | 7.00 | 7.00 | 7.00 | 7.00 | 7.00 | 7.00 |
| Flute | Manipulable | 7.00 | 7.00 | 7.00 | 6.99 | 7.00 | 7.00 | 7.00 | 7.00 | 7.00 | 7.00 | 7.00 | 7.00 |
| Fork | Manipulable | 7.00 | 7.00 | 7.00 | 6.99 | 7.00 | 7.00 | 7.00 | 7.00 | 7.00 | 7.00 | 7.00 | 7.00 |
| Hairbrush | Manipulable | 7.00 | 7.00 | 7.00 | 7.00 | 7.00 | 7.00 | 7.00 | 7.00 | 7.00 | 7.00 | 7.00 | 7.00 |
| Hammer | Manipulable | 7.00 | 7.00 | 7.00 | 7.00 | 7.00 | 7.00 | 7.00 | 7.00 | 7.00 | 7.00 | 7.00 | 7.00 |
| Knife | Manipulable | 7.00 | 7.00 | 7.00 | 6.99 | 7.00 | 7.00 | 7.00 | 7.00 | 7.00 | 7.00 | 7.00 | 7.00 |
| Pencil | Manipulable | 7.00 | 7.00 | 7.00 | 6.99 | 7.00 | 7.00 | 7.00 | 7.00 | 7.00 | 7.00 | 7.00 | 7.00 |
| Piano | Manipulable | 7.00 | 7.00 | 7.00 | 6.99 | 7.00 | 7.00 | 7.00 | 7.00 | 7.00 | 7.00 | 7.00 | 7.00 |
| Rope | Manipulable | 7.00 | 7.00 | 7.00 | 6.99 | 7.00 | 7.00 | 7.00 | 7.00 | 7.00 | 7.00 | 7.00 | 7.00 |
| Scissors | Manipulable | 7.00 | 7.00 | 7.00 | 7.00 | 7.00 | 7.00 | 7.00 | 7.00 | 7.00 | 7.00 | 7.00 | 7.00 |
| Spear | Manipulable | 7.00 | 7.00 | 7.00 | 6.98 | 7.00 | 7.00 | 7.00 | 7.00 | 7.00 | 6.50 | 7.00 | 7.00 |
| Spoon | Manipulable | 7.00 | 7.00 | 7.00 | 7.00 | 7.00 | 7.00 | 7.00 | 7.00 | 7.00 | 7.00 | 7.00 | 7.00 |
| Umbrella | Manipulable | 7.00 | 7.00 | 7.00 | 6.99 | 7.00 | 7.00 | 7.00 | 7.00 | 7.00 | 7.00 | 7.00 | 7.00 |
| Violin | Manipulable | 7.00 | 7.00 | 7.00 | 6.99 | 7.00 | 7.00 | 7.00 | 7.00 | 7.00 | 7.00 | 7.00 | 7.00 |

| Cement | Non Manipulable | 5.00 | 6.00 | 7.00 | 6.98 | 7.00 | 7.00 | 7.00 | 7.00 | 7.00 | 6.00 | 6.50 | 7.00 |
| --- | --- | --- | --- | --- | --- | --- | --- | --- | --- | --- | --- | --- | --- |
| Circus | Non Manipulable | 2.00 | 3.00 | 4.00 | 6.00 | 7.00 | 7.00 | 7.00 | 7.00 | 7.00 | 6.00 | 6.00 | 7.00 |
| Dome | Non Manipulable | 3.00 | 4.00 | 5.00 | 6.00 | 6.00 | 7.00 | 6.00 | 7.00 | 7.00 | 4.57 | 5.00 | 6.00 |
| Dungeon | Non Manipulable | 3.00 | 3.50 | 4.00 | 6.00 | 6.99 | 7.00 | 6.00 | 7.00 | 7.00 | 5.00 | 5.97 | 6.00 |
| Fence | Non Manipulable | 6.00 | 7.00 | 7.00 | 6.98 | 7.00 | 7.00 | 7.00 | 7.00 | 7.00 | 6.00 | 7.00 | 7.00 |
| Ferry | Non Manipulable | 3.00 | 4.00 | 5.00 | 6.00 | 7.00 | 7.00 | 7.00 | 7.00 | 7.00 | 5.50 | 6.00 | 6.39 |
| Flood | Non Manipulable | 2.00 | 3.00 | 4.00 | 6.00 | 7.00 | 7.00 | 7.00 | 7.00 | 7.00 | 5.00 | 6.00 | 6.33 |
| Glacier | Non Manipulable | 3.00 | 4.00 | 5.00 | 6.00 | 7.00 | 7.00 | 7.00 | 7.00 | 7.00 | 7.00 | 7.00 | 7.00 |
| Mansion | Non Manipulable | 2.00 | 2.00 | 3.00 | 6.00 | 6.00 | 7.00 | 7.00 | 7.00 | 7.00 | 6.00 | 6.00 | 7.00 |
| Moon | Non Manipulable | 6.00 | 6.00 | 7.00 | 6.00 | 7.00 | 7.00 | 7.00 | 7.00 | 7.00 | 6.00 | 6.00 | 7.00 |
| Palace | Non Manipulable | 3.00 | 4.00 | 4.00 | 6.97 | 7.00 | 7.00 | 7.00 | 7.00 | 7.00 | 6.00 | 6.00 | 7.00 |
| Prison | Non Manipulable | 3.00 | 4.00 | 5.00 | 6.00 | 7.00 | 7.00 | 7.00 | 7.00 | 7.00 | 5.51 | 6.00 | 6.06 |
| Rain | Non Manipulable | 5.00 | 6.00 | 6.00 | 6.98 | 7.00 | 7.00 | 7.00 | 7.00 | 7.00 | 6.00 | 6.42 | 7.00 |
| Robot | Non Manipulable | 1.00 | 2.00 | 2.50 | 6.97 | 7.00 | 7.00 | 7.00 | 7.00 | 7.00 | 5.00 | 6.00 | 6.01 |
| Rocket | Non Manipulable | 3.00 | 4.00 | 5.00 | 6.00 | 7.00 | 7.00 | 7.00 | 7.00 | 7.00 | 5.00 | 6.00 | 6.00 |
| Storm | Non Manipulable | 1.00 | 2.00 | 3.00 | 6.00 | 6.00 | 7.00 | 7.00 | 7.00 | 7.00 | 6.00 | 6.11 | 7.00 |
| Tornado | Non Manipulable | 1.00 | 2.00 | 3.00 | 6.00 | 7.00 | 7.00 | 7.00 | 7.00 | 7.00 | 6.00 | 7.00 | 7.00 |
| Artist | Social Org. | 4.00 | 4.00 | 5.00 | 6.00 | 6.00 | 7.00 | 6.00 | 7.00 | 7.00 | 5.00 | 5.94 | 6.00 |
| Aunt | Social Org. | 4.00 | 4.00 | 5.00 | 6.00 | 6.00 | 7.00 | 6.00 | 7.00 | 7.00 | 5.00 | 5.52 | 6.00 |
| Autumn | Social Org. | 1.00 | 1.00 | 2.00 | 4.99 | 5.00 | 5.50 | 6.00 | 7.00 | 7.00 | 5.00 | 6.00 | 6.00 |
| Banker | Social Org. | 4.00 | 5.00 | 5.00 | 6.47 | 7.00 | 7.00 | 6.00 | 7.00 | 7.00 | 4.97 | 5.00 | 6.00 |
| Barber | Social Org. | 4.00 | 4.00 | 5.00 | 6.95 | 7.00 | 7.00 | 7.00 | 7.00 | 7.00 | 5.00 | 6.00 | 6.01 |
| Bishop | Social Org. | 3.00 | 4.00 | 5.00 | 5.00 | 6.00 | 6.03 | 5.00 | 6.00 | 7.00 | 4.50 | 5.00 | 6.00 |
| Clerk | Social Org. | 3.00 | 4.00 | 5.00 | 6.00 | 6.99 | 7.00 | 6.00 | 7.00 | 7.00 | 4.14 | 5.00 | 6.00 |
| Doctor | Social Org. | 4.00 | 4.50 | 5.00 | 6.00 | 6.99 | 7.00 | 7.00 | 7.00 | 7.00 | 5.02 | 6.00 | 7.00 |
| Farmer | Social Org. | 4.00 | 5.00 | 5.00 | 6.00 | 7.00 | 7.00 | 7.00 | 7.00 | 7.00 | 5.00 | 6.00 | 6.00 |
| King | Social Org. | 3.49 | 4.00 | 5.00 | 6.00 | 7.00 | 7.00 | 7.00 | 7.00 | 7.00 | 5.00 | 6.00 | 6.02 |
| Mermaid | Social Org. | 2.00 | 3.00 | 4.00 | 5.00 | 6.00 | 7.00 | 7.00 | 7.00 | 7.00 | 4.00 | 4.53 | 6.00 |
| Nurse | Social Org. | 4.00 | 4.00 | 5.00 | 6.00 | 7.00 | 7.00 | 7.00 | 7.00 | 7.00 | 5.00 | 6.00 | 6.48 |
| Pianist | Social Org. | 4.00 | 5.00 | 5.00 | 6.00 | 6.50 | 7.00 | 7.00 | 7.00 | 7.00 | 6.00 | 6.00 | 7.00 |
| Prince | Social Org. | 3.00 | 4.00 | 5.00 | 6.00 | 7.00 | 7.00 | 6.49 | 7.00 | 7.00 | 5.00 | 5.63 | 6.00 |
| Queen | Social Org. | 3.99 | 4.00 | 5.00 | 6.00 | 7.00 | 7.00 | 7.00 | 7.00 | 7.00 | 4.00 | 6.00 | 6.00 |
| Soldier | Social Org. | 4.00 | 5.00 | 5.00 | 6.00 | 7.00 | 7.00 | 7.00 | 7.00 | 7.00 | 5.00 | 6.00 | 6.00 |
| Winter | Social Org. | 1.00 | 2.00 | 2.00 | 5.00 | 5.00 | 6.00 | 6.00 | 7.00 | 7.00 | 5.00 | 6.00 | 6.92 |

**Table 1: Nouns and their values across different rating scales.** Values presented here correspond to the bootstrap values for each word, in each scale. We report the lower bound and the upper bound of each CI, together with the corresponding median value. ACT: Action scale, CON: Concreteness scale, IMA: Imageability scale, SEN: Sensory scale. LB: Lower Bound, M: Median, UB: Upper Bound.

4.

| **Verbs** | **Categories** | **ACT_LB** | **ACT_M** | **ACT_UB** | **CON_LB** | **CON_M** | **CON_UB** | **IMA_LB** | **IMA_M** | **IMA_UB** | **SEN_LB** | **SEN_M** | **SEN_UB** |
| --- | --- | --- | --- | --- | --- | --- | --- | --- | --- | --- | --- | --- | --- |
| To Comb | Action | 6.99 | 7.00 | 7.00 | 7.00 | 7.00 | 7.00 | 6.99 | 7.00 | 7.00 | 6.28 | 7.00 | 7.00 |
| To Dance | Action | 6.99 | 7.00 | 7.00 | 7.00 | 7.00 | 7.00 | 6.99 | 7.00 | 7.00 | 7.00 | 7.00 | 7.00 |
| To Grasp | Action | 6.00 | 7.00 | 7.00 | 6.00 | 7.00 | 7.00 | 6.00 | 6.00 | 7.00 | 6.00 | 6.00 | 7.00 |
| To Hop | Action | 7.00 | 7.00 | 7.00 | 7.00 | 7.00 | 7.00 | 6.99 | 7.00 | 7.00 | 7.00 | 7.00 | 7.00 |
| To Hug | Action | 7.00 | 7.00 | 7.00 | 7.00 | 7.00 | 7.00 | 6.99 | 7.00 | 7.00 | 7.00 | 7.00 | 7.00 |
| To Kick | Action | 7.00 | 7.00 | 7.00 | 7.00 | 7.00 | 7.00 | 7.00 | 7.00 | 7.00 | 7.00 | 7.00 | 7.00 |
| To Lick | Action | 7.00 | 7.00 | 7.00 | 7.00 | 7.00 | 7.00 | 6.99 | 7.00 | 7.00 | 7.00 | 7.00 | 7.00 |
| To Nod | Action | 7.00 | 7.00 | 7.00 | 7.00 | 7.00 | 7.00 | 6.99 | 7.00 | 7.00 | 6.00 | 7.00 | 7.00 |
| To Pinch | Action | 7.00 | 7.00 | 7.00 | 7.00 | 7.00 | 7.00 | 6.99 | 7.00 | 7.00 | 7.00 | 7.00 | 7.00 |
| To Polish | Action | 6.00 | 7.00 | 7.00 | 6.00 | 7.00 | 7.00 | 6.00 | 7.00 | 7.00 | 5.95 | 6.00 | 7.00 |
| To Shout | Action | 6.99 | 7.00 | 7.00 | 7.00 | 7.00 | 7.00 | 6.99 | 7.00 | 7.00 | 6.97 | 7.00 | 7.00 |
| To Sing | Action | 7.00 | 7.00 | 7.00 | 7.00 | 7.00 | 7.00 | 6.99 | 7.00 | 7.00 | 7.00 | 7.00 | 7.00 |
| To Speak | Action | 7.00 | 7.00 | 7.00 | 7.00 | 7.00 | 7.00 | 6.99 | 7.00 | 7.00 | 7.00 | 7.00 | 7.00 |
| To Sprint | Action | 6.99 | 7.00 | 7.00 | 7.00 | 7.00 | 7.00 | 7.00 | 7.00 | 7.00 | 6.00 | 7.00 | 7.00 |
| To Squeeze | Action | 7.00 | 7.00 | 7.00 | 7.00 | 7.00 | 7.00 | 6.99 | 7.00 | 7.00 | 7.00 | 7.00 | 7.00 |
| To Walk | Action | 7.00 | 7.00 | 7.00 | 7.00 | 7.00 | 7.00 | 7.00 | 7.00 | 7.00 | 6.97 | 7.00 | 7.00 |
| To Wipe | Action | 6.99 | 7.00 | 7.00 | 7.00 | 7.00 | 7.00 | 6.99 | 7.00 | 7.00 | 6.29 | 7.00 | 7.00 |
| To Admire | Cognitive | 2.00 | 2.00 | 3.00 | 2.00 | 2.00 | 3.00 | 1.00 | 2.00 | 2.00 | 1.00 | 2.00 | 2.00 |
| To Adore | Cognitive | 2.00 | 3.00 | 3.05 | 2.00 | 2.00 | 3.00 | 1.99 | 2.00 | 2.00 | 2.00 | 2.00 | 2.05 |
| To Anger | Cognitive | 3.00 | 3.00 | 4.00 | 2.00 | 3.00 | 3.00 | 2.00 | 2.00 | 3.00 | 2.00 | 2.00 | 3.00 |
| To Annoy | Cognitive | 3.00 | 3.00 | 4.00 | 3.00 | 3.00 | 3.00 | 2.00 | 3.00 | 3.00 | 2.00 | 2.00 | 2.24 |
| To Appreciate | Cognitive | 2.97 | 3.00 | 4.00 | 3.00 | 3.00 | 3.00 | 2.00 | 3.00 | 3.00 | 2.00 | 2.00 | 2.20 |
| To Delight | Cognitive | 2.00 | 3.00 | 3.00 | 2.00 | 2.50 | 3.00 | 2.00 | 2.00 | 2.48 | 1.97 | 2.00 | 2.02 |
| To Detest | Cognitive | 2.00 | 3.00 | 3.00 | 2.00 | 3.00 | 3.00 | 2.00 | 2.00 | 3.00 | 1.48 | 2.00 | 2.03 |
| To Enjoy | Cognitive | 2.00 | 3.00 | 3.00 | 2.00 | 2.00 | 3.00 | 2.00 | 2.00 | 2.02 | 1.97 | 2.00 | 2.00 |
| To Entertain | Cognitive | 3.00 | 3.50 | 4.96 | 3.00 | 4.00 | 4.00 | 3.00 | 4.00 | 4.00 | 2.00 | 2.00 | 2.55 |
| To Frighten | Cognitive | 3.00 | 3.00 | 4.00 | 1.00 | 2.00 | 2.50 | 1.98 | 2.00 | 2.00 | 1.00 | 2.00 | 2.00 |
| To Hate | Cognitive | 2.00 | 3.00 | 3.00 | 2.00 | 2.00 | 3.00 | 2.00 | 2.00 | 3.00 | 1.97 | 2.00 | 2.02 |
| To Love | Cognitive | 3.00 | 4.00 | 4.50 | 2.00 | 3.00 | 3.50 | 2.00 | 3.00 | 3.00 | 2.00 | 2.00 | 2.03 |
| To Panic | Cognitive | 3.43 | 4.00 | 5.00 | 3.00 | 4.00 | 5.00 | 5.00 | 6.00 | 6.00 | 3.00 | 4.00 | 4.50 |
| To Respect | Cognitive | 3.00 | 3.00 | 4.00 | 3.00 | 3.00 | 3.00 | 2.00 | 2.00 | 2.99 | 2.00 | 2.00 | 2.00 |
| To Scare | Cognitive | 2.00 | 2.00 | 3.00 | 2.00 | 2.00 | 3.00 | 1.00 | 2.00 | 2.00 | 1.00 | 1.75 | 2.00 |
| To Thrill | Cognitive | 3.00 | 4.00 | 4.00 | 2.00 | 2.00 | 3.00 | 2.00 | 3.00 | 3.50 | 1.02 | 2.00 | 2.00 |
| To Worship | Cognitive | 2.00 | 3.00 | 3.00 | 2.00 | 3.00 | 3.00 | 2.00 | 2.00 | 2.01 | 1.16 | 2.00 | 2.28 |

| To Assume | Emotional | 2.00 | 3.00 | 3.50 | 3.00 | 3.00 | 4.00 | 2.00 | 3.00 | 4.00 | 2.00 | 2.00 | 2.44 |
| --- | --- | --- | --- | --- | --- | --- | --- | --- | --- | --- | --- | --- | --- |
| To Comprehend | Emotional | 3.00 | 3.00 | 4.00 | 3.00 | 3.00 | 4.00 | 2.00 | 3.00 | 3.00 | 2.00 | 2.00 | 2.72 |
| To Conceive | Emotional | 3.00 | 4.00 | 4.50 | 3.00 | 3.50 | 4.00 | 3.00 | 4.00 | 4.00 | 2.00 | 3.00 | 3.50 |
| To Concentrate | Emotional | 4.00 | 5.00 | 5.00 | 4.00 | 4.00 | 5.00 | 3.00 | 3.50 | 4.00 | 2.00 | 3.00 | 3.00 |
| To Confuse | Emotional | 2.00 | 2.50 | 3.00 | 2.00 | 3.00 | 3.00 | 2.00 | 2.00 | 3.00 | 2.00 | 2.00 | 2.00 |
| To Contemplate | Emotional | 3.00 | 3.00 | 3.55 | 3.00 | 3.00 | 3.00 | 2.00 | 3.00 | 3.00 | 2.00 | 2.50 | 3.00 |
| To Decipher | Emotional | 2.00 | 3.00 | 3.00 | 2.00 | 3.00 | 3.00 | 2.00 | 2.00 | 3.00 | 2.00 | 2.00 | 2.71 |
| To Doubt | Emotional | 3.00 | 4.00 | 4.98 | 3.00 | 3.50 | 4.00 | 3.00 | 4.00 | 5.00 | 2.00 | 3.00 | 3.00 |
| To Hesitate | Emotional | 4.00 | 4.00 | 5.00 | 4.00 | 4.00 | 5.00 | 4.00 | 4.00 | 5.00 | 3.00 | 3.68 | 4.00 |
| To Imagine | Emotional | 4.00 | 5.00 | 5.00 | 4.00 | 5.00 | 5.00 | 4.03 | 5.00 | 6.00 | 4.00 | 4.97 | 5.00 |
| To Interpret | Emotional | 2.50 | 3.00 | 4.00 | 2.00 | 3.00 | 3.00 | 2.00 | 3.00 | 4.00 | 2.00 | 2.00 | 2.93 |
| To Judge | Emotional | 2.00 | 3.00 | 4.00 | 2.00 | 2.00 | 3.00 | 3.00 | 3.00 | 4.00 | 2.00 | 3.00 | 3.16 |
| To Meditate | Emotional | 4.00 | 5.00 | 5.00 | 4.00 | 5.00 | 5.00 | 4.00 | 5.00 | 5.00 | 3.00 | 3.79 | 4.00 |
| To Recall | Emotional | 2.00 | 3.00 | 3.00 | 2.50 | 3.00 | 3.00 | 2.00 | 2.50 | 3.00 | 1.22 | 2.00 | 2.00 |
| To Suppose | Emotional | 4.00 | 5.00 | 6.00 | 5.00 | 5.00 | 5.61 | 5.00 | 6.00 | 6.00 | 4.00 | 4.06 | 5.00 |
| To Think | Emotional | 3.00 | 4.00 | 4.00 | 3.00 | 4.00 | 4.00 | 3.00 | 3.50 | 4.00 | 3.00 | 3.00 | 4.00 |
| To Understand | Emotional | 4.00 | 4.00 | 5.00 | 3.00 | 4.00 | 5.00 | 4.00 | 5.00 | 5.00 | 2.00 | 3.00 | 4.00 |
| To Bark | Non Human Action | 6.98 | 7.00 | 7.00 | 7.00 | 7.00 | 7.00 | 6.98 | 7.00 | 7.00 | 6.00 | 7.00 | 7.00 |
| To Bray | Non Human Action | 3.00 | 4.00 | 4.00 | 3.00 | 3.00 | 4.00 | 2.00 | 3.00 | 4.00 | 3.00 | 3.64 | 4.00 |
| To Buzz | Non Human Action | 6.00 | 7.00 | 7.00 | 6.00 | 6.00 | 7.00 | 6.00 | 6.50 | 7.00 | 6.00 | 6.00 | 7.00 |
| To Canter | Non Human Action | 4.00 | 4.50 | 6.00 | 3.91 | 4.00 | 5.00 | 3.96 | 4.00 | 5.00 | 4.00 | 4.00 | 5.00 |
| To Cluck | Non Human Action | 6.00 | 7.00 | 7.00 | 6.00 | 7.00 | 7.00 | 6.97 | 7.00 | 7.00 | 6.00 | 6.52 | 7.00 |
| To Croak | Non Human Action | 6.00 | 7.00 | 7.00 | 6.00 | 6.00 | 7.00 | 6.93 | 7.00 | 7.00 | 6.00 | 6.68 | 7.00 |
| To Fly | Non Human Action | 3.50 | 5.00 | 6.00 | 6.00 | 7.00 | 7.00 | 6.97 | 7.00 | 7.00 | 5.52 | 6.00 | 7.00 |
| To Grunt | Non Human Action | 6.99 | 7.00 | 7.00 | 7.00 | 7.00 | 7.00 | 6.98 | 7.00 | 7.00 | 6.00 | 7.00 | 7.00 |
| To Howl | Non Human Action | 6.98 | 7.00 | 7.00 | 6.00 | 7.00 | 7.00 | 6.97 | 7.00 | 7.00 | 6.01 | 7.00 | 7.00 |
| To Meow | Non Human Action | 6.99 | 7.00 | 7.00 | 7.00 | 7.00 | 7.00 | 6.98 | 7.00 | 7.00 | 6.00 | 7.00 | 7.00 |
| To Moo | Non Human Action | 6.99 | 7.00 | 7.00 | 7.00 | 7.00 | 7.00 | 6.98 | 7.00 | 7.00 | 6.91 | 7.00 | 7.00 |
| To Nest | Non Human Action | 3.00 | 4.00 | 4.00 | 4.00 | 5.00 | 5.00 | 4.00 | 5.00 | 6.00 | 3.00 | 4.00 | 4.66 |
| To Oink | Non Human Action | 6.98 | 7.00 | 7.00 | 7.00 | 7.00 | 7.00 | 6.99 | 7.00 | 7.00 | 6.09 | 7.00 | 7.00 |
| To Prance | Non Human Action | 6.00 | 7.00 | 7.00 | 6.00 | 7.00 | 7.00 | 6.98 | 7.00 | 7.00 | 6.00 | 6.00 | 6.10 |
| To Roar | Non Human Action | 6.98 | 7.00 | 7.00 | 6.00 | 7.00 | 7.00 | 6.98 | 7.00 | 7.00 | 6.00 | 7.00 | 7.00 |
| To Stalk | Non Human Action | 4.00 | 5.00 | 5.00 | 4.50 | 5.00 | 5.00 | 5.00 | 5.00 | 6.00 | 4.00 | 4.00 | 5.00 |
| To Sting | Non Human Action | 5.00 | 6.00 | 6.00 | 6.00 | 6.50 | 7.00 | 6.00 | 7.00 | 7.00 | 6.10 | 7.00 | 7.00 |

**Table 2: Verbs and their values across different rating scales.** Values presented here correspond to the bootstrap values for each word, in each scale. We report the lower bound and the upper bound of each CI, together with the corresponding median value. ACT: Action scale, CON: Concreteness scale, IMA: Imageability scale, SEN: Sensory scale. LB: Lower Bound, M: Median, UB: Upper Bound.
